# Supplementary material for: Opioid Education and Nasal Naloxone Rescue Kits in the Emergency Department
Source: PubMed Central journal article supplement (PMC4427207; doi:10.5811/westjem.2015.2.24909), 2015-04-01

# Naloxone for Overdose Prevention

patient name

date of birth

patient address

patient city, state, ZIP code

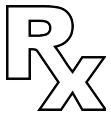

prescriber name

prescriber address

prescriber city, state, ZIP code

prescriber phone number

Naloxone HCl 1 mg/mL  
2 x 2 mL as pre-filled Luer-Lock needled syringe  
(NDC 76329-3369-1 )

Refills: \_\_\_\_\_

2 x Intranasal Mucosal Atomizing Device (MAD 300)

Refills: \_\_\_\_\_

For suspected opioid overdose, spray 1mL in each nostril.  
Repeat after 3 minutes if no or minimal response.

Pharmacist: Call 1-800-788-7999 to order MAD 300.

prescriber signature

date

Detach for patient

## How to Avoid Overdose

- Only take medicine prescribed to you
- Don't take more than instructed

- Call a doctor if your pain gets worse
- Never mix pain meds with alcohol
- Avoid sleeping pills when taking pain meds

- Dispose of unused medications
- Store your medicine in a secure place
- Learn how to use naloxone

- Teach your family + friends how to respond to an overdose

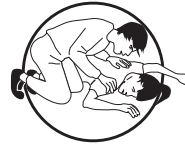

## Are they breathing? → Call 911 for help

Signs of an overdose:

- Slow or shallow breathing
- Gasping for air when sleeping or weird snoring
- Pale or bluish skin
- Slow heartbeat, low blood pressure
- Won't wake up or respond (rub knuckles on sternum)

All you have to say:  
"Someone is unresponsive and not breathing."  
Give clear address and location.

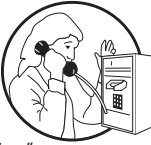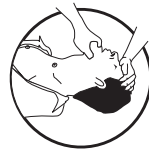

## Airway → Rescue breathing

Make sure nothing is inside the person's mouth.

Oxygen saves lives. Breathe for them.  
One hand on chin, tilt head back, pinch nose closed.  
Make a seal over mouth & breathe in  
1 breath every 5 seconds  
Chest should rise, not stomach

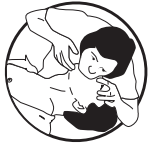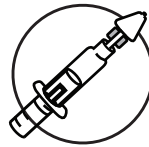

## Prepare Naloxone

Are they any better? Can you get naloxone and prepare it quickly enough that they won't go for too long without your breathing assistance?

[PrescribeToPrevent.org](http://PrescribeToPrevent.org)

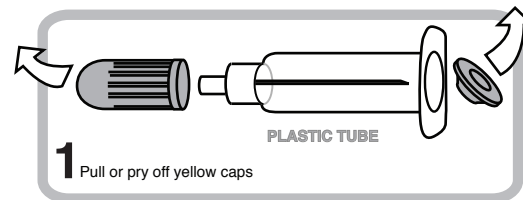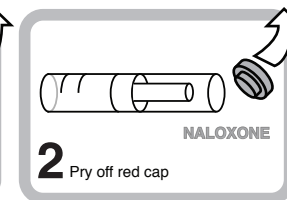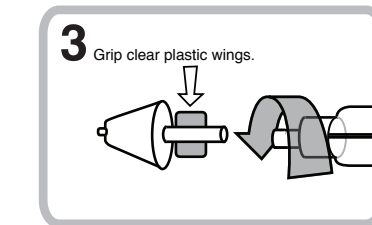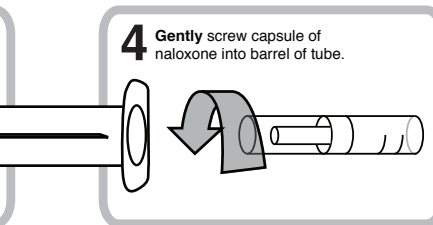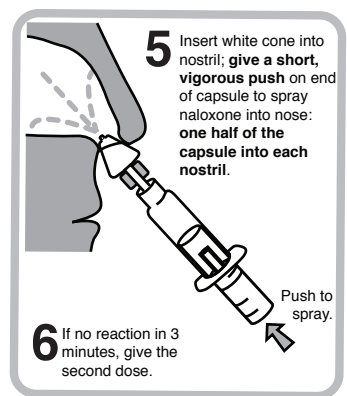

Source: HarmReduction.org

## Evaluate + support

- Continue rescue breathing
- Give another 2 sprays of naloxone in 3 minutes if no or minimal breathing or responsiveness
- Naloxone wears off in 30-90 minutes
- Comfort them; withdrawal can be unpleasant
- Get them medical care and help them not use more opiate right away
- Encourage survivors to seek treatment if they feel they have a problem

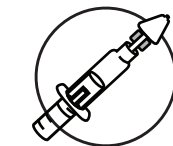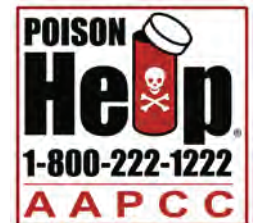

Supplement: wjem-16-381-s002.pdf [file wjem-16-381-s002.pdf]
