# Supplementary material for: Opioid Education and Nasal Naloxone Rescue Kits in the Emergency Department
Source: PubMed Central journal article supplement (PMC4427207; doi:10.5811/westjem.2015.2.24909), 2015-04-01
Supplement: wjem-16-381-s001.pdf [file wjem-16-381-s001.pdf]

# Project ASSERT Overdose Education Quality Improvement Questionnaire

Ver: 10/13/11

|                    |                                               |
|--------------------|-----------------------------------------------|
| Interviewer: _____ | Date of Interview: ____/____/____<br>MM DD YY |
|--------------------|-----------------------------------------------|

## **OVERDOSE EDUCATION AND NARCAN HISTORY**

1. How long ago did you visit with Project ASSERT? [Prompt with visit date in IBEX]  
\_\_\_\_ months [convert days and years to months]

2. Have you received overdose education here at Boston Medical Center from Project Assert?

1  Yes

2  No

3. Have you received overdose education elsewhere?

1  Yes

2  No

b. If yes, from where? \_\_\_\_\_ (Write-in)

4. Have you received a narcan rescue kit from Project Assert?

1  Yes a. When? \_\_\_\_/\_\_\_\_/\_\_\_\_ [Confirm the date in the database]

2  No

5. Have you ever received a narcan rescue kit elsewhere?

1  Yes a. When? \_\_\_\_/\_\_\_\_/\_\_\_\_

2  No

11. If yes, from where?

1  Needle exchange

4  From a friend/acquaintance

2  Drop-in Center

5  Methadone program

3  Detox Program

6  Other \_\_\_\_\_

IF NEVER RECEIVED A NARCAN RESCUE KIT, SKIP TO QUESTION #9

6. Where is your narcan rescue kit now?

1  Used by me to reverse an overdose

5  With my friend

2  Used by someone else to reverse and overdose

6  Lost

3  With me now

7  Other \_\_\_\_\_

4  Where I live

IF THE KIT HAS NOT BEEN USED TO REVERSE AND OVERDOSE, SKIP TO QUESTION #9

## Project ASSERT Overdose Education Quality Improvement Questionnaire

Ver: 10/13/11

7. If since obtaining your narcan rescue kit, you or someone else used it to reverse an overdose, who was it used on?

- 1  Significant other/Spouse      5  Friend  
2  Parent      6  Stranger  
3  Sibling      7  Self  
4  Child      8  Other \_\_\_\_\_

8. Did it successfully reverse the overdose?

- 1  Yes  
2  No

### **PERSONAL OVERDOSE HISTORY**

9. How many times have you overdosed since you were at Project ASSERT on \_\_\_\_/\_\_\_\_/\_\_\_\_?

\_\_\_\_\_  
IF ZERO OVERDOSES, SKIP TO QUESTION #12

*Last Overdose*

10. When was your last overdose? \_\_\_\_/\_\_\_\_/\_\_\_\_?

11. Did you receive narcan?

- 1  Yes, from emergency medical provider  
2  Yes, from non-medical person      a. Was the narcan from your narcan rescue kit? 1  Yes 2  No  
3  No  
4  Don't know/Don't remember

### **OVERDOSE BYSTANDER HISTORY**

12. How many overdoses have you *witnessed* since you were at Project ASSERT on \_\_\_\_/\_\_\_\_/\_\_\_\_? \_\_\_\_\_

IF ZERO OVERDOSES, SKIP TO QUESTION #18

*Last Overdose*

13. Did the victim receive narcan?

- 1  Yes, from emergency medical provider  
2  Yes, from me  
3  Yes, from other non-medical person  
4  No  
5  Don't know/Don't remember  
a. If yes, how many doses did the victim receive? \_\_\_\_

**Project ASSERT Overdose Education Quality Improvement Questionnaire**

Ver: 10/13/11

14. Did you perform rescue breathing?

1  Yes

2  No

a. Did anyone else perform rescue breathing?

1  Yes

2  No

15. Did you call 911 or ask for emergency medical help?

1  Yes

2  No

a. Did anyone else call 911 or ask for emergency medical help?

1  Yes

2  No

16. Did you stay with the victim until he or she got better or emergency medical personnel came to help the victim?

1  Yes

2  No

a. Did anyone else stay with the victim until he or she got better or emergency medical personnel came to help the victim?

1  Yes

2  No

3  Don't know/Don't remember

17. What was your relationship with the person who overdosed the *last time you witnessed an overdose*?

1  Significant other/Spouse

4  Child

2  Parent

5  Friend

3  Sibling

6  Stranger

**30 day substance use**

18. How many days in the last 30 days have you used (No use in the past 30 days = 00):

|                                                     |       |                                  |                                     |                                         |                                         |
|-----------------------------------------------------|-------|----------------------------------|-------------------------------------|-----------------------------------------|-----------------------------------------|
| Alcohol                                             | _____ |                                  |                                     |                                         |                                         |
| Cocaine                                             | _____ |                                  |                                     |                                         |                                         |
| Methamphetamine                                     | _____ |                                  |                                     |                                         |                                         |
| Marijuana                                           | _____ |                                  |                                     |                                         |                                         |
| Heroin                                              | _____ |                                  |                                     |                                         |                                         |
| Methadone                                           | _____ | <input type="checkbox"/> Program | <input type="checkbox"/> Detox      | <input type="checkbox"/> Prescribed     | <input type="checkbox"/> Not Prescribed |
| Suboxone                                            | _____ | <input type="checkbox"/> Program | <input type="checkbox"/> Detox      | <input type="checkbox"/> Prescribed     | <input type="checkbox"/> Not Prescribed |
| Percocet, oxycodone, OxyContin, "Perc 30s", "Roxys" | _____ |                                  |                                     | <input type="checkbox"/> Prescribed     | <input type="checkbox"/> Not Prescribed |
| Vicodin/ hydrocodone                                | _____ |                                  |                                     | <input type="checkbox"/> Prescribed     | <input type="checkbox"/> Not Prescribed |
| Fentanyl/ Duragesic                                 | _____ |                                  |                                     | <input type="checkbox"/> Prescribed     | <input type="checkbox"/> Not Prescribed |
| Other opioid, name the opioid:<br>_____             | _____ | <input type="checkbox"/> Detox   | <input type="checkbox"/> Prescribed | <input type="checkbox"/> Not Prescribed |                                         |

# Project ASSERT Overdose Education Quality Improvement Questionnaire

Ver: 10/13/11

|                                                         |       |                                |                                     |                                         |
|---------------------------------------------------------|-------|--------------------------------|-------------------------------------|-----------------------------------------|
| Benzodiazepines (Klonopin, Xanax, Ativan, Valium, etc.) | _____ | <input type="checkbox"/> Detox | <input type="checkbox"/> Prescribed | <input type="checkbox"/> Not Prescribed |
| Clonidine                                               | _____ | <input type="checkbox"/> Detox | <input type="checkbox"/> Prescribed | <input type="checkbox"/> Not Prescribed |
| Phenergan                                               | _____ |                                | <input type="checkbox"/> Prescribed | <input type="checkbox"/> Not Prescribed |
| Neurontin                                               | _____ |                                | <input type="checkbox"/> Prescribed | <input type="checkbox"/> Not Prescribed |
| Seroquel                                                | _____ |                                | <input type="checkbox"/> Prescribed | <input type="checkbox"/> Not Prescribed |
| Baclofen                                                | _____ |                                | <input type="checkbox"/> Prescribed | <input type="checkbox"/> Not Prescribed |
| Other:                                                  | _____ | <input type="checkbox"/> Detox | <input type="checkbox"/> Prescribed | <input type="checkbox"/> Not Prescribed |
| _____                                                   |       |                                |                                     |                                         |

### 30day overdose risk

19. How many days out of the last 30 days have you used opioids (heroin, methadone, suboxone, morphine, oxycodone, Percocet, etc.):
- a. With cocaine, alcohol, benzodiazepines, or other pills, like clonidine, phenergan, seroquel, or neurontin? \_\_\_\_\_
  - b. While you were alone, meaning no one would find you if you overdosed? \_\_\_\_\_
  - c. After 2 days or more of abstinence, like after being incarcerated, after leaving detox, or being hospitalized? \_\_\_\_\_

### Overdose Risk Knowledge Assessment

20. What increases a person's risk for opioid overdose? Please try to think of at least 4 things.

- 1  Mixing opioids with other psychoactive substances
- 2  Periods of abstinence
- 3  Using alone
- 4  Chronic medical conditions, such as liver, kidney or lung disease
- 5  Other \_\_\_\_\_

[Total the number of correct answers without prompting or clueing the respondent]: \_\_\_\_\_

### General Quality Improvement questions

21. How important do you think it is to learn how to prevent, recognize and respond to an overdose?

- 1  Very important
- 2  Somewhat important
- 3  Not important

22. Is the emergency department or urgent care a good place to receive overdose education?

- 1  Yes
- 2  No

a. Why or Why not? \_\_\_\_\_ (Write-in)

23. What are the good and bad things about overdose counseling in the Emergency Department?

\_\_\_\_\_  
\_\_\_\_\_  
\_\_\_\_\_  
\_\_\_\_\_ (Write-in)

**Project ASSERT Overdose Education Quality Improvement Questionnaire**

Ver: 10/13/11

24. How do you think Project ASSERT can improve its efforts at overdose education and naloxone distribution? \_\_\_\_\_ (Write-in)

\_\_\_\_\_  
\_\_\_\_\_  
\_\_\_\_\_

**Demographics from SDK**

25. ED Discharge Diagnosis on day of Project ASSERT visit: \_\_\_\_\_

26. Gender?

- 1  Female
- 2  Male
- 3  FtM Transgender
- 4  MtF Transgender

27. Years old? \_\_\_\_ \_\_\_\_

28. Race?

- 1  African American/Black
- 2  Asian
- 3  White
- 4  Other: \_\_\_\_\_

29. Ethnicity?

- 1  Hispanic/Latino/Latina
- 2  Other: \_\_\_\_\_
